## SHORT COMMUNICATION

# Tissue-dependent variation of hydrogen sulfide homeostasis in anoxic freshwater turtles

Birgitte Jensen<sup>1,2</sup>, Sibile Pardue<sup>2</sup>, Christopher G. Kevil<sup>2</sup> and Angela Fago<sup>1,\*</sup>

## ABSTRACT

Hydrogen sulfide (H<sub>2</sub>S) controls numerous physiological responses. To understand its proposed role in metabolic suppression, we measured free H<sub>2</sub>S and bound sulfane sulfur (BSS) in tissues of the freshwater turtle *Trachemys scripta elegans*, a species undergoing strong metabolic suppression when cold and anoxic. In warm normoxic turtles, free H<sub>2</sub>S was higher in red blood cells (RBCs) and kidney (~9–10 μmol l<sup>-1</sup>) than in brain, liver and lung (~1–2 μmol l<sup>-1</sup>). These values overall aligned with the tissue H<sub>2</sub>S-generating enzymatic activity. BSS levels were similar in all tissues (~0.5 μmol l<sup>-1</sup>) but ~100-fold higher in RBCs, which have a high thiol content, suggesting that RBCs function as a circulating H<sub>2</sub>S reservoir. Cold acclimation caused significant changes in free and bound H<sub>2</sub>S in liver, brain and RBCs, but anoxia had no further effect, except in the brain. These results show tissue-dependent sulfide signaling with a potential role in brain metabolic suppression during anoxia in turtles.

**KEY WORDS:** Anoxia, Gasotransmitter, Red blood cell, Metabolic suppression, *Trachemys scripta*

## INTRODUCTION

Hydrogen sulfide (H<sub>2</sub>S) has emerged as an important signaling molecule belonging to the family of gasotransmitters together with nitric oxide (NO) and carbon monoxide (Kolluru et al., 2017; Olson and Straub, 2016; Wang, 2002). First discovered as a modulator in the brain (Abe and Kimura, 1996), H<sub>2</sub>S was later found to control other key physiological functions, such as vascular tone and cytoprotection (Elrod et al., 2007; Yang et al., 2008; Zhao et al., 2012). H<sub>2</sub>S conveys its biological activity by binding reversibly to ferric heme proteins (Jensen and Fago, 2018; Pietri et al., 2011) and by S-sulfhydration of thiol groups (Mustafa et al., 2009; Paul and Snyder, 2012), but also via other sulfur-containing compounds, such as persulfides (R-S-SH), polysulfides (R-S<sub>n</sub>-R, n>2) and thiosulfate (S<sub>2</sub>O<sub>3</sub><sup>2-</sup>) (Kimura, 2017; Olson et al., 2013; Shen et al., 2017). Endogenous H<sub>2</sub>S is produced in the cytosol enzymatically by cystathionine β-synthase (CBS) and cystathionine γ-lyase (CSE), using (homo)-cysteine and cystathionine as main substrates. In the mitochondria, 3-mercaptopyruvate sulfurtransferase is the primary enzyme producing H<sub>2</sub>S from mercaptopyruvate assisted by cysteine aminotransferase, though this enzyme machinery is also present in the cytosol (Nagahara et al., 1998). In addition to enzymatically

produced H<sub>2</sub>S, free H<sub>2</sub>S can also be regenerated by reduction of bound stores of persulfides, polysulfides and thiosulfate, collectively representing the bound sulfane sulfur (BSS) fraction (Koike and Ogasawara, 2016; Shen et al., 2012, 2015). During low O<sub>2</sub> conditions, H<sub>2</sub>S can be regenerated from thiosulfate (Olson et al., 2013), as part of a potential oxygen-sensing mechanism (Olson, 2013), as well as from persulfides and polysulfides (Ishigami et al., 2009; Kimura, 2014a).

The discovery that exposure to exogenous H<sub>2</sub>S gas triggers reversible suspended animation in mice (Blackstone et al., 2005) has fostered the idea that endogenous H<sub>2</sub>S may control the biological metabolic suppression of hibernating animals. To fit with this proposed *in vivo* role, H<sub>2</sub>S is an *in vitro* reversible inhibitor of cytochrome c oxidase (Collman et al., 2009; Cooper and Brown, 2008; Pietri et al., 2011), thus being able to modulate mitochondrial oxygen consumption. In a previous analysis of blood samples from free-ranging summer active and winter-hibernating brown bears (Revsbech et al., 2014), we detected changes in free H<sub>2</sub>S and BSS during hibernation, consistent with the generation of free H<sub>2</sub>S from circulating storage pools that may contribute to the suppression of mitochondrial respiration in tissues. Moreover, the substrate cysteine shifted towards the synthesis of RBC glutathione (GSH), which increased dramatically (Revsbech et al., 2014).

In hibernating bears, O<sub>2</sub> consumption rate falls to ~25% of basal levels (Tøien et al., 2011); in comparison, some turtle species are capable of overwintering in complete anoxia, sustaining even more pronounced metabolic suppression, down to 5–10% of basal levels (Bickler and Buck, 2007; Ultsch, 2006). Among these turtle species, the red-eared slider, *Trachemys scripta elegans* (Wied-Neuwied 1839), is among the most extreme vertebrates as it can survive for weeks in anoxia at low temperatures, relying only on glycolysis for energy production (Bundgaard et al., 2019; Ultsch, 1989, 2006; Warren et al., 2006). Thus, we hypothesized that *T. scripta elegans* endogenous levels of free H<sub>2</sub>S and BSS in various tissues should change more markedly upon cold acclimation and anoxia than found in the brown bears (Revsbech et al., 2014). Furthermore, NO metabolites are known to increase dramatically in the blood (Jacobsen et al., 2012) and tissues (Jensen et al., 2014) of anoxia-acclimated *T. scripta elegans* and may contribute further to the strong metabolic suppression of this species (Fago and Jensen, 2015), although not necessarily to cytoprotection against oxidative stress at reoxygenation, at least in the heart (Bundgaard et al., 2018).

## MATERIALS AND METHODS

### Chemicals

All chemicals were obtained from Sigma-Aldrich unless otherwise stated.

### Animals

Adult red-eared sliders of both sex (*Trachemys scripta elegans*) kept in aquaria at the animal care facility at Zoophysiology, Aarhus

<sup>1</sup>Department of Bioscience, Aarhus University, DK-8000 Aarhus C, Denmark.

<sup>2</sup>Department of Pathology, Louisiana State University Health Sciences Center, Shreveport, LA 71130, USA.

\*Author for correspondence (angela.fago@bios.au.dk)

DOI: 10.1242/jeb.203976

**List of abbreviations**

|                                 |                                       |
|---------------------------------|---------------------------------------|
| BSS                             | bound sulfane sulfur                  |
| CBS                             | cystathionine $\beta$ -synthase       |
| CSE                             | cystathionine $\gamma$ -lyase         |
| GSH                             | glutathione                           |
| H <sub>2</sub> S                | hydrogen sulfide                      |
| Hb                              | hemoglobin                            |
| MBB                             | monobromobimane                       |
| NMADR                           | <i>N</i> -methyl-D-aspartate receptor |
| NO                              | nitric oxide                          |
| RBC                             | red blood cell                        |
| R-S-SH                          | persulfides                           |
| R-S <sub>n</sub> -R, $n \geq 2$ | polysulfides                          |
| SDB                             | sulfide dibimane                      |

University, were used for experiments. While fasted, the turtles were progressively acclimated to low temperature (5°C) followed by randomized exposure to either normoxic ( $N=5$ ,  $0.66 \pm 0.13$  kg) (termed 'cold normoxia') or anoxic conditions ( $N=4$ ,  $0.64 \pm 0.07$  kg) (termed 'cold anoxia') for 9 days, according to a previously described protocol (Bundgaard et al., 2018; Bundgaard et al., 2019; Jensen et al., 2014). A control group ( $N=5$ ,  $0.61 \pm 0.04$  kg) of non-fasting turtles taken directly from the aquaria at 25°C was also included in the study (termed 'warm normoxia'). All procedures were performed in accordance with regulations of animal care and experimentation in Denmark under permit 2015-15-0201-00544.

**Tissue sampling**

Turtles were killed as previously described (Bundgaard et al., 2018). In brief, an overdose of pentobarbital ( $50 \text{ mg kg}^{-1}$ ) was given via the supravertebral venous sinus. When reflexes were lost, the head was cut off and an opening was made in the plastron. After removing the heart (used for another study), a blood sample was quickly collected in heparin-filled syringes from the thoracic cavity and centrifuged (2000 *g*, 3 min) to separate RBCs from plasma; 250  $\mu\text{l}$  RBCs were diluted in 800  $\mu\text{l}$  100  $\text{mmol l}^{-1}$  Tris-HCl buffer (pH 9.5, 0.1  $\text{mmol l}^{-1}$  DTPA) and snap-frozen in liquid N<sub>2</sub>. Tissue samples (~150 mg), including liver, brain, lung and kidney) were harvested and conserved in 800  $\mu\text{l}$  of 100  $\text{mmol l}^{-1}$  Tris-HCl buffer (pH 9.5, 0.1  $\text{mmol l}^{-1}$  DTPA) followed by snap-freezing in liquid N<sub>2</sub>. All samples were weighed to calculate the exact dilution factor. The whole procedure was completed within 20 min. Samples were shipped on dry ice to Louisiana State University Health Sciences Center, Shreveport, LA, USA, where H<sub>2</sub>S metabolite analysis took place. Additional tissue samples were collected and stored at -80°C for enzyme activity measurements at Aarhus University.

**H<sub>2</sub>S metabolites**

Bioavailable biochemical forms of H<sub>2</sub>S including free H<sub>2</sub>S and BSS (including persulfides, polysulfides and thiosulfate) were measured by a fluorescent monobromobimane (MBB) assay coupled with RP-HPLC as previously described (Shen et al., 2011, 2012, 2015). This method has been extensively refined to determine specific incubation pH conditions and reaction times (<30 min) of MBB to derivatize biological sulfide and its various forms with minimal interference or artifact (Shen et al., 2011). The MBB assay reported here was performed under exacting specifications to ensure minimal chemical interference and maintain the chemical identity and abundance of various sulfide species, as previously confirmed in a separate publication using LC/MS non-radioisotopic standardization (Shen et al., 2014). In this method, the tissue

homogenates were prepared in alkaline 100  $\text{mmol l}^{-1}$  Tris-HCl buffer (to convert all free H<sub>2</sub>S gas to the HS<sup>-</sup> anionic form). HS<sup>-</sup> was then derivatized by incubation with excess MBB (10  $\text{mmol l}^{-1}$  in CH<sub>3</sub>CN) for 30 min; 1  $\text{mmol l}^{-1}$  TCEP [tris(2-carboxyethyl)phosphine hydrochloride] was used to liberate total stored sulfide (Shen et al., 2012, 2015). The whole procedure was done at room temperature at 1% O<sub>2</sub> in a hypoxic chamber in the dark. All measurements were obtained in technical triplicate. MBB was separated from the product, sulfide dibimane (SDB), by a RP-HPLC equipped with a fluorescence detector ( $\lambda_{\text{ex}}$ : 390 nm and  $\lambda_{\text{em}}$ : 475 nm). Retention time was 16.5 and 17.6 min, respectively. The amount of SDB in each sample was quantified from a standard curve. H<sub>2</sub>S is a weak acid in solution ( $\text{pK}_{\text{a1}} \sim 6.8$ , 37°C) (Li and Lancaster, 2013), and under physiological conditions, ~80% of total sulfide is present as hydrosulfide anion. When using the MBB method, the equilibrium  $\text{H}_2\text{S} \rightleftharpoons \text{HS}^- + \text{H}^+$  is right-shifted as a result of alkaline conditions, and thus the method measures both H<sub>2</sub>S and HS<sup>-</sup>. For simplicity, the two species are here collectively referred to as H<sub>2</sub>S.

**Enzyme activity**

The activity of H<sub>2</sub>S-producing enzymes was measured in warm normoxic turtles. Tissue homogenates were prepared in 100  $\text{mmol l}^{-1}$  potassium phosphate buffer+1  $\text{mmol l}^{-1}$  EDTA, pH 7.4, mixed with 90  $\text{mmol l}^{-1}$  pyridoxal 5'-phosphate and incubated in a 1 ml glass chamber with continuous stirring (500 rpm) at room temperature. A final concentration of 250  $\text{mmol l}^{-1}$  cysteine was added to initiate the reaction. Production of H<sub>2</sub>S over time was measured with an amperometric H<sub>2</sub>S-specific microsensor (Unisense A/S, Aarhus, Denmark), calibrated with a freshly made Na<sub>2</sub>S stock solution of known concentration ( $r^2=0.99$ ). Activity was expressed as nanomoles of H<sub>2</sub>S produced per milligram total protein per hour. Protein content was measured by a colorimetric assay using bovine serum albumin as a standard. Protein concentration in RBCs was measured as Hb concentration determined from the oxyHb extinction coefficients at 541 nm of 13.8 l  $\text{mmol}^{-1} \text{cm}^{-1}$ , 577 nm of 14.6 l  $\text{mmol}^{-1} \text{cm}^{-1}$  and 415 nm of 125 l  $\text{mmol}^{-1} \text{cm}^{-1}$ .

**Lactate**

Plasma lactate concentrations were measured in a subsample of normoxic and anoxic turtles by a colorimetric L-lactate assay kit (ab65331, Abcam, Denmark).

**Statistics**

Statistical analyses were done in Prism (GraphPad Software Inc., La Jolla, CA, USA). Shapiro-Wilk normality test was applied to determine whether data were normally distributed. Significant differences between warm normoxic turtles, cold normoxic turtles and cold anoxic turtles were assessed by one-way ANOVA with Dunnett's multiple comparisons test (normally distributed) and the few non-normally distributed datasets were assessed by non-parametric Kruskal-Wallis test with Dunn's multiple comparisons test (Table S1). The significance level was  $P < 0.05$ . All data are reported as means  $\pm$  s.e.m.

**RESULTS AND DISCUSSION**

To examine for changes in H<sub>2</sub>S metabolism during the extreme metabolic suppression of cold-acclimated and anoxic turtles, we kept turtles at 25°C under normoxia and at 5°C under either normoxia or anoxia for 9 days, as described previously (Bundgaard et al., 2019). We then measured *in vivo* pools of free H<sub>2</sub>S and BSS in kidney, brain, liver, lung and RBC samples using the MBB method

(Shen et al., 2012, 2015). An increase in plasma lactate from  $0.21 \pm 0.04$  mmol l<sup>-1</sup> (cold normoxic turtles) to  $19.4 \pm 9.7$  mmol l<sup>-1</sup> (cold anoxic turtles) confirmed that glycolysis was upregulated and that turtles were anoxic. Physiological basal levels (expressed in  $\mu\text{mol l}^{-1}$ ) of free H<sub>2</sub>S and BSS in kidney, brain, liver and lung homogenates of freshwater turtle are shown in Fig. 1. An overview of H<sub>2</sub>S levels normalized to total protein content is given in Fig. S1. To our knowledge, this is the first time that H<sub>2</sub>S metabolites have been measured in a reptile.

### Free H<sub>2</sub>S in kidney, brain, liver and lung

Our analysis showed that the levels of free H<sub>2</sub>S in tissues of warm normoxic turtles were highest in the kidneys ( $9.3 \pm 0.4$   $\mu\text{mol l}^{-1}$ ) and lowest in the brain, liver and lung ( $0.9$ – $2.5$   $\mu\text{mol l}^{-1}$ ) (Fig. 1A). Upon cold acclimation of turtles to 5°C, these values did not change, except in the liver, where free H<sub>2</sub>S decreased significantly (Fig. 1A). No increase was observed in free H<sub>2</sub>S after acclimation of turtles to anoxia for 9 days in any of these tissues (Fig. 1A). This finding suggests that free H<sub>2</sub>S is not involved in overall metabolic suppression, although we cannot exclude that the lack of O<sub>2</sub> would enhance the inhibitory effect of H<sub>2</sub>S on cytochrome *c* oxidase activity. O<sub>2</sub> and H<sub>2</sub>S levels are inversely linked (Olson and Straub, 2016), as a result of the oxidative degradation of H<sub>2</sub>S (Hildebrandt and Grieshaber, 2008), and H<sub>2</sub>S lifetime increases when O<sub>2</sub> is limiting.

Although not in our experimental setup, the natural environment of overwintering anoxic turtles is presumably sulfide rich, which could add to the *in vivo* H<sub>2</sub>S levels. A recent study on amphibian fish inhabiting sulfide-rich mangroves found no change in aquatic H<sub>2</sub>S sensitivity between wild-caught and laboratory-reared fish in terms of behavior (Cochrane et al., 2019); however, further studies are needed on the potential adaptations to environmental H<sub>2</sub>S in vertebrates.

That free H<sub>2</sub>S is high in the kidneys (Fig. 1A) is not unique to turtles, as mammals also exhibit abundant H<sub>2</sub>S levels (Shen et al., 2013). The enzyme D-amino acid oxidase constitutes an additional enzymatic pathway for H<sub>2</sub>S production and is highly expressed in mammalian kidneys (Shibuya et al., 2013). In mammals, endogenous H<sub>2</sub>S is proposed to be important for normal kidney function (Lobb et al., 2015) and H<sub>2</sub>S has been shown to increase glomerular filtration rate (Xia et al., 2009) and salt excretion by inhibition of Na<sup>+</sup>/K<sup>+</sup>-ATPase (Ge et al., 2014), and to suppress renin release (Cao and Bian, 2016). Given that H<sub>2</sub>S is an ancient vasoregulatory molecule across multiple vertebrate clades (Dombkowski et al., 2004), our data indicate that H<sub>2</sub>S could also have a similar regulatory role in the renal function of turtles. Protein content in the kidney did not change during acclimation, but free H<sub>2</sub>S normalized to total protein decreased significantly in cold anoxic turtles compared with warm normoxic ones (Fig. S1). Compared with other tissues such as brain

and liver, the kidneys of anoxic turtles exhibit the highest reduction in blood flow (Stecyk et al., 2004), suggesting H<sub>2</sub>S-mediated regulation of vascular tone in this organ.

### BSS in kidney, brain, liver and lung

BSS levels were overall similar in tissues of all three groups of turtles, except for the brain, where BSS decreased significantly when cold-acclimated turtles were exposed to anoxia (Fig. 1B) without increasing free H<sub>2</sub>S (Fig. 1A). In mammals, H<sub>2</sub>S and H<sub>2</sub>S-derived polysulfides in the brain are implicated in neuroprotection and have been shown to regulate the activity of essential receptors such as *N*-methyl-D-aspartate receptor (NMDAR) and transient receptor potential ankyrin (TRPA) by persulfhydration (Abe and Kimura, 1996; Kimura, 2014b; Kimura et al., 2013; Li et al., 2017). In the turtle brain, NMDAR is strongly inhibited during anoxia by phosphorylation (Bickler and Buck, 2007) and cysteine *S*-nitrosation (Takahashi et al., 2007) to limit neuronal activity and protect the turtle brain from damage and cell death (Bickler and Buck, 2007). One can speculate that an increased persulfhydration may enhance the activity of NMDAR (Abe and Kimura, 1996) and other brain receptors at low temperatures in normoxia (Fig. 1B) and promote subsequent inhibition by increased *S*-nitrosation in hypoxia and anoxia (Fago and Jensen, 2015; Jensen et al., 2014). There is emerging evidence of complex H<sub>2</sub>S/NO cross-talk of protein cysteine redox modifications that remains to be investigated in detail (Cortese-Krott et al., 2015, 2017; Hosoki et al., 1997; Miyamoto et al., 2017). Besides possible interactions including production of polysulfides (Miyamoto et al., 2017), the two gasotransmitters have been suggested to have several overlapping functions (Kolluru et al., 2013).

### H<sub>2</sub>S and BSS in RBCs

The level of free H<sub>2</sub>S in RBCs was  $10.5 \pm 0.8$   $\mu\text{mol l}^{-1}$  in warm normoxic turtles (Fig. 2A), which is not far from the value reported for human RBCs measured using a MBB-based method ( $3.8 \pm 1.0$   $\mu\text{mol l}^{-1}$ ) (Tan et al., 2017). RBC free H<sub>2</sub>S increased 2-fold in cold-acclimated turtles in normoxia but did not change further in anoxia (Fig. 2A), as for the other tissues (Fig. 1A). BSS concentrations in RBCs were remarkably high in warm normoxic turtles ( $68 \pm 3$   $\mu\text{mol l}^{-1}$ ) compared with those of other tissues and increased even more in cold-acclimated normoxic and anoxic turtles ( $121 \pm 8$  and  $91 \pm 9$   $\mu\text{mol l}^{-1}$ , respectively) (Fig. 2B). These high values of BSS in RBCs appear to be consistent with the high content ( $\sim 24$  mmol l<sup>-1</sup>) of total reactive thiols in *T. scripta elegans* RBCs, including those of hemoglobin (Hb) and GSH (Damsgaard et al., 2013; Jacobsen et al., 2012; Petersen et al., 2018). Thiols can potentially be partly sulfhydrated (i.e. R-S-SH) and contribute to the

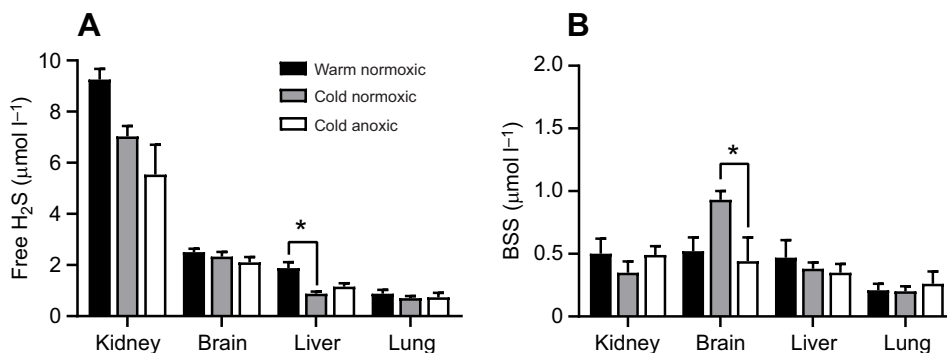

**Fig. 1. Free H<sub>2</sub>S and bound sulfane sulfur (BSS) in tissues of *Trachemys scripta elegans*.** Tissue concentration of (A) free H<sub>2</sub>S and (B) BSS in warm normoxic turtles ( $N=5$  brain, liver, lung;  $N=3$  kidney) and cold normoxic turtles ( $N=5$  brain, liver, lung;  $N=4$  kidney) and cold anoxic turtles ( $N=4$  for all tissues). Data are means  $\pm$  s.e.m. Significant differences (ANOVA/Kruskal-Wallis tests) are indicated (\* $P<0.05$ ).



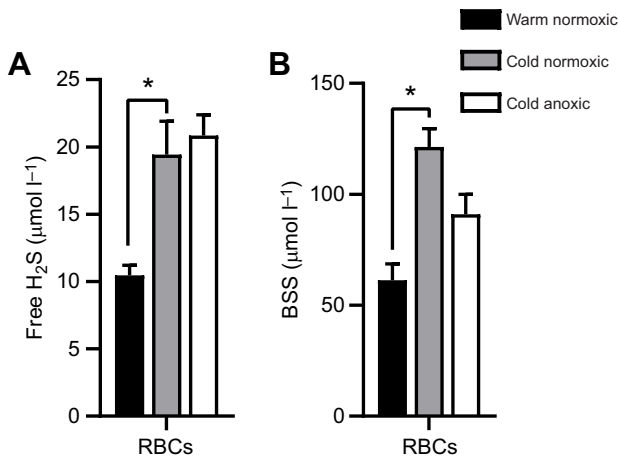

**Fig. 2. Free H<sub>2</sub>S and BSS in *T. scripta elegans* red blood cells (RBCs).** Concentration in RBCs of (A) free H<sub>2</sub>S and (B) BSS in warm normoxic turtles ( $N=4$ ), cold normoxic turtles ( $N=5$ ) and cold anoxic turtles ( $N=4$ ). Data are means  $\pm$  s.e.m. Significant differences (ANOVA/Kruskal–Wallis tests) are indicated (\* $P<0.05$ ).

BSS pool, and in *T. scripta elegans* Hb, we have previously identified bound persulfide and polysulfides by mass spectrometry (Petersen et al., 2018). Considering that protein sulfhydration is a pervasive modification (Mishanina et al., 2015) estimated to be up to 10–25% for certain proteins (Mustafa et al., 2009), the values of  $\sim 70$ – $120 \mu\text{mol l}^{-1}$  detected here indicate a maximum of 0.25–0.5% of total protein thiol sulfhydration in turtle RBCs, which is not unrealistic. Sulfur extraction from GSH is expected to be only 0.01% under the conditions used in the MBB methods (Montoya et al., 2015), and would therefore not contribute much. In addition to protein sulfhydration, some of the BSS pool may originate from H<sub>2</sub>S coordinated to the ferric heme in methHb (Jensen and Fago, 2018). MethHb in freshwater turtles is  $\sim 1.0\%$  of total Hb (Maginniss et al., 1983), which corresponds to  $\sim 20 \mu\text{mol l}^{-1}$  ferric heme capacity available for H<sub>2</sub>S binding and release (Jensen and Fago, 2018). Therefore, these data suggest that *T. scripta* RBCs may act as a circulating storage pool of bound sulfide, that can either take up or regenerate free H<sub>2</sub>S by varying cellular redox conditions, pH and body temperature (Fig. 2).

### Enzymatic H<sub>2</sub>S production

We added cysteine to tissue homogenates to detect the generation of H<sub>2</sub>S by the combined enzymatic activity of CBS and CSE (Vicente et al., 2016) by using a H<sub>2</sub>S-specific microsensor (Fig. 3A). The enzymatic activity of H<sub>2</sub>S production was highest in the kidneys, which aligns with the high concentration of free H<sub>2</sub>S in this tissue (Fig. 3B). RBCs, brain, liver and kidney all showed comparable enzymatic activity (Fig. 3B). This finding implies that the high levels of free H<sub>2</sub>S and BSS detected in RBCs (Fig. 2) are not due to a particularly high capacity for enzymatic production, and further supports a role for RBCs as a circulating H<sub>2</sub>S reservoir.

### H<sub>2</sub>S versus NO

H<sub>2</sub>S and NO are involved in numerous physiological functions. NO upregulation may contribute to metabolic suppression in *T. scripta* (Fago and Jensen, 2015; Jensen et al., 2014), but apparently not in hibernating brown bears (Revsbech et al., 2014). In contrast, free H<sub>2</sub>S and BSS decrease in the blood of hibernating bears (Revsbech et al., 2014), whereas in turtle blood, free H<sub>2</sub>S and BSS increase during cold acclimation, but show no further change during anoxia

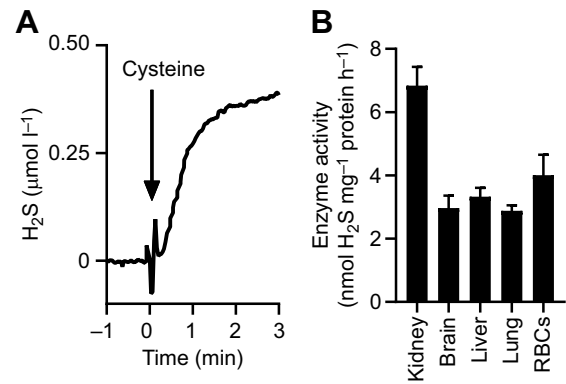

**Fig. 3. H<sub>2</sub>S enzyme activity in tissues of *T. scripta elegans*.**

(A) Representative trace from a H<sub>2</sub>S microsensor. (B) Enzymatic production of H<sub>2</sub>S in tissues and RBCs of warm normoxic turtles.  $N=5$  brain, liver, lung;  $N=4$  RBCs;  $N=3$  kidney. Data are means  $\pm$  s.e.m.

(Fig. 2). This suggests that NO may be the major gasotransmitter regulating physiological responses in turtles during anoxia. But, H<sub>2</sub>S could play a role in cytoprotection, as suggested by the enlarged BSS storage pool of cold-acclimated turtles (Fig. 2B).

### Concluding remarks

In conclusion, we observed tissue-specific changes in endogenous levels of free H<sub>2</sub>S and BSS upon cold acclimation and 9 days of anoxia in *T. scripta elegans* liver and brain and especially RBCs. In warm normoxic turtles, the levels of free H<sub>2</sub>S were highest in RBCs and kidney and lowest in brain, liver and lung, which matched the observed enzymatic production rates of H<sub>2</sub>S. BSS levels were 100-fold higher in RBCs than in other tissues, indicating that turtle RBCs may function as a circulating reservoir for bioactive H<sub>2</sub>S bound to Hb's ferric heme and thiols as persulfide and polysulfides. Besides changes in brain BSS, free H<sub>2</sub>S and BSS levels increased during cold acclimation only in the RBCs, where they remained high during anoxia. Interestingly, levels of NO metabolites have been found to increase dramatically in the blood (Jacobsen et al., 2012) of anoxia-acclimated *T. scripta*. In contrast, in plasma of hibernating bears, free H<sub>2</sub>S and BSS decrease, while nitrite did not change significantly (Revsbech et al., 2014). These differences suggest distinct effects on aerobic or anaerobic metabolic suppression mediated by NO and H<sub>2</sub>S, respectively, that are yet to be fully unraveled.

### Acknowledgements

We thank Amanda Bundgaard for assisting with turtle acclimation, Inge Grønvald Revsbech for support during tissue sampling and Elin E. Pedersen for technical assistance with lactate measurements.

### Competing interests

The authors declare no competing or financial interests. C.G.K. has intellectual property regarding sulfide measurement technologies and a commercial interest in Innolyzer Labs, LLC, Shreveport, LA 71103, USA.

### Author contributions

Conceptualization: B.J., A.F.; Methodology: B.J., S.P., C.G.K.; Formal analysis: B.J., S.P.; Investigation: B.J., S.P.; Resources: C.G.K., A.F.; Writing - original draft: B.J.; Writing - review & editing: B.J., C.G.K., A.F.; Supervision: C.G.K., A.F.; Funding acquisition: B.J., C.G.K., A.F.

### Funding

This work was supported by Det Frie Forskningsråd | Natur og Univers (grant 4181-00094 to A.F.), by Aarhus Universitets Forskningsfond (NOVA grant AUFF-E-2016-9-37 to A.F.) and by a Company of Biologists travel grant to B.J. Results in this report were also supported by an Institutional Development Award (IDeA) from the National

Institute of General Medical Sciences of the U.S. National Institutes of Health under grant number P20GM121307. Deposited in PMC for release after 12 months.

# Supplementary information

Supplementary information available online at

<http://jeb.biologists.org/lookup/doi/10.1242/jeb.203976.supplemental>

# References

- Abe, K. and Kimura, H. (1996). The possible role of hydrogen sulfide as an endogenous neuromodulator. *J. Neurosci.* **16**, 1066–1071. doi:10.1523/JNEUROSCI.16-03-1066.1996
- Bickler, P. E. and Buck, L. T. (2007). Hypoxia tolerance in reptiles, amphibians, and fishes: life with variable oxygen availability. *Annu. Rev. Physiol.* **69**, 145–170. doi:10.1146/annurev.physiol.69.031905.162529
- Blackstone, E., Morrison, M. and Roth, M. B. (2005). H<sub>2</sub>S induces a suspended animation-like state in mice. *Science* **308**, 518–518. doi:10.1126/science.1108581
- Bundgaard, A., James, A. M., Joyce, W., Murphy, M. P. and Fago, A. (2018). Suppression of reactive oxygen species generation in heart mitochondria from anoxic turtles: the role of complex I S-nitrosation. *J. Exp. Biol.* **1**, 174391. doi:10.1242/jeb.174391
- Bundgaard, A., James, A. M., Gruszczynski, A. V., Martin, J., Murphy, M. P. and Fago, A. (2019). Metabolic adaptations during extreme anoxia in the turtle heart and their implications for ischemia-reperfusion injury. *Sci. Rep.* **9**, 2850. doi:10.1038/s41598-019-39836-5
- Cao, X. and Bian, J. S. (2016). The role of hydrogen sulfide in renal system. *Front. Pharmacol.* **7**, 1–12. doi:10.3389/fphar.2016.00385
- Cochrane, P. V., Rossi, G. S., Tunnah, L., Jonz, M. G. and Wright, P. A. (2019). Hydrogen sulphide toxicity and the importance of amphibious behaviour in a mangrove fish inhabiting sulphide-rich habitats. *J. Comp. Physiol. B* **189**, 223–235. doi:10.1007/s00360-019-01204-0
- Collman, J. P., Ghosh, S., Dey, A. and Decréau, R. A. (2009). Using a functional enzyme model to understand the chemistry behind hydrogen sulfide induced hibernation. *Proc. Natl. Acad. Sci. USA* **106**, 22090–22095. doi:10.1073/pnas.0904082106
- Cooper, C. E. and Brown, G. C. (2008). The inhibition of mitochondrial cytochrome oxidase by the gases carbon monoxide, nitric oxide, hydrogen cyanide and hydrogen sulfide: Chemical mechanism and physiological significance. *J. Bioenerg. Biomembr.* **40**, 533–539. doi:10.1007/s10863-008-9166-6
- Cortese-Krott, M. M., Kuhnle, G. G. C., Dyson, A., Fernandez, B. O., Grman, M., DuMond, J. F., Barrow, M. P., McLeod, G., Nakagawa, H., Ondrias, K. et al. (2015). Key bioactive reaction products of the NO/H<sub>2</sub>S interaction are S/N-hybrid species, polysulfides, and nitroxyl. *Proc. Natl. Acad. Sci. USA* **112**, E4651–E4660. doi:10.1073/pnas.1509277112
- Cortese-Krott, M. M., Koning, A., Kuhnle, G. G. C., Nagy, P., Bianco, C. L., Pasch, A., Wink, D. A., Fukuto, J. M., Jackson, A. A., van Goor, H. et al. (2017). The reactive species interactome: evolutionary emergence, biological significance and opportunities for redox metabolomics and personalized medicine. *Antioxid. Redox Signal.* **27**, 684–712. doi:10.1089/ars.2017.7083
- Damsgaard, C., Storz, J. F., Hoffmann, F. G. and Fago, A. (2013). Hemoglobin isoform differentiation and allosteric regulation of oxygen binding in the turtle, *Trachemys scripta*. *Am. J. Physiol. Regul. Integr. Comp. Physiol.* **305**, R961–R967. doi:10.1152/ajpregu.00284.2013
- Dombkowski, R. A., Russell, M. J., Schulman, A. A., Doelman, M. M. and Olson, K. R. (2004). Vertebrate phylogeny of hydrogen sulfide vasoactivity. *Am. J. Physiol. Regul. Integr. Comp. Physiol.* **288**, R243–R252. doi:10.1152/ajpregu.00324.2004
- Elrod, J. W., Calvert, J. W., Morrison, J., Doeller, J. E., Kraus, D. W., Tao, L., Jiao, X., Scalia, R., Kiss, L., Szabo, C. et al. (2007). Hydrogen sulfide attenuates myocardial ischemia-reperfusion injury by preservation of mitochondrial function. *Proc. Natl. Acad. Sci. USA* **104**, 15560–15565. doi:10.1073/pnas.0705891104
- Fago, A. and Jensen, F. B. (2015). Hypoxia tolerance, nitric oxide, and nitrite: Lessons from extreme animals. *Physiology* **30**, 116–126. doi:10.1152/physiol.00051.2014
- Ge, S.-N., Zhao, M.-M., Wu, D.-D., Chen, Y., Wang, Y., Zhu, J.-H., Cai, W.-J., Zhu, Y.-Z. and Zhu, Y.-C. (2014). Hydrogen sulfide targets EGFR Cys797/Cys798 residues to induce Na<sup>+</sup>/K<sup>+</sup>-ATPase endocytosis and inhibition in renal tubular epithelial cells and increase sodium excretion in chronic salt-loaded rats. *Antioxid. Redox Signal.* **21**, 2061–2082. doi:10.1089/ars.2013.5304
- Hildebrandt, T. M. and Grieshaber, M. K. (2008). Three enzymatic activities catalyze the oxidation of sulfide to thiosulfate in mammalian and invertebrate mitochondria. *FEBS J.* **275**, 3352–3361. doi:10.1111/j.1742-4658.2008.06482.x
- Hosoki, R., Matsuki, N. and Kimura, H. (1997). The possible role of hydrogen sulfide as an endogenous smooth muscle relaxant in synergy with nitric oxide. *Biochem. Biophys. Res. Commun.* **237**, 527–531. doi:10.1006/bbrc.1997.6878
- Ishigami, M., Hiraki, K., Umehara, K., Ogasawara, Y., Ishii, K. and Kimura, H. (2009). A source of hydrogen sulfide and a mechanism of its release in the brain. *Antioxid. Redox Signal.* **11**, 205–214. doi:10.1089/ars.2008.2132
- Jacobsen, S. B., Hansen, M. N., Jensen, F. B., Skovgaard, N., Wang, T. and Fago, A. (2012). Circulating nitric oxide metabolites and cardiovascular changes in the turtle *Trachemys scripta* during normoxia, anoxia and reoxygenation. *J. Exp. Biol.* **215**, 2560–2566. doi:10.1242/jeb.070367
- Jensen, B. and Fago, A. (2018). Reactions of ferric hemoglobin and myoglobin with hydrogen sulfide under physiological conditions. *J. Inorg. Biochem.* **182**, 133–140. doi:10.1016/j.jinorgbio.2018.02.007
- Jensen, F. B., Hansen, M. N., Montesanti, G. and Wang, T. (2014). Nitric oxide metabolites during anoxia and reoxygenation in the anoxia-tolerant vertebrate *Trachemys scripta*. *J. Exp. Biol.* **217**, 423–431. doi:10.1242/jeb.093179
- Kimura, H. (2014a). Signaling molecules: Hydrogen sulfide and polysulfide. *Antioxid. Redox Signal.* **22**, 362–376. doi:10.1089/ars.2014.5869
- Kimura, H. (2014b). The physiological role of hydrogen sulfide and beyond. *Nitric Oxide* **41**, 4–10. doi:10.1016/j.niox.2014.01.002
- Kimura, H. (2017). Hydrogen sulfide and polysulfide signaling. *Antioxid. Redox Signal.* **27**, 619–621. doi:10.1089/ars.2017.7076
- Kimura, Y., Mikami, Y., Osumi, K., Tsugane, M., Oka, J. I. and Kimura, H. (2013). Polysulfides are possible H<sub>2</sub>S-derived signaling molecules in rat brain. *FASEB J.* **27**, 2451–2457. doi:10.1096/fj.12-226415
- Koike, S. and Ogasawara, Y. (2016). Sulfur atom in its bound state is a unique element involved in physiological functions in mammals. *Molecules* **21**, 1753. doi:10.3390/molecules21121753
- Kolluru, G. K., Shen, X. and Kevil, C. G. (2013). A tale of two gases: NO and H<sub>2</sub>S, foes or friends for life? *Redox Biol.* **1**, 313–318. doi:10.1016/j.redox.2013.05.001
- Kolluru, G. K., Shen, X., Yuan, S. and Kevil, C. G. (2017). Gasotransmitter heterocellular signaling. *Antioxid. Redox Signal.* **26**, 936–960. doi:10.1089/ars.2016.6909
- Li, Q. and Lancaster, J. R., Jr (2013). Chemical foundations of hydrogen sulfide biology. *Nitric Oxide* **35**, 21–34. doi:10.1016/j.niox.2013.07.001
- Li, Y.-L., Wu, P.-F., Chen, J.-G., Wang, S., Han, Q.-Q., Li, D., Wang, W., Guan, X.-L., Li, D., Long, L.-H. et al. (2017). Activity-dependent sulphydration signal controls N-Methyl-D-Aspartate subtype glutamate receptor-dependent synaptic plasticity via increasing D-serine availability. *Antioxid. Redox Signal.* **27**, 398–414. doi:10.1089/ars.2016.6936
- Lobb, I., Sonke, E., Aboalsamh, G. and Sener, A. (2015). Hydrogen sulphide and the kidney: Important roles in renal physiology and pathogenesis and treatment of kidney injury and disease. *Nitric Oxide* **46**, 55–65. doi:10.1016/j.niox.2014.10.004
- Maginniss, L. A., Tapper, S. S. and Miller, L. S. (1983). Effect of chronic cold and submergence on blood oxygen transport in the turtle, *Chrysemys picta*. *Respir. Physiol.* **53**, 15–29. doi:10.1016/0034-5687(83)90013-0
- Mishanina, T. V., Libiad, M. and Banerjee, R. (2015). Biogenesis of reactive sulfur species for signaling by hydrogen sulfide oxidation pathways. *Nat. Chem. Biol.* **11**, 457–464. doi:10.1038/nchembio.1834
- Miyamoto, R., Koike, S., Takano, Y., Shibuya, N., Kimura, Y., Hanaoka, K., Urano, Y., Ogasawara, Y. and Kimura, H. (2017). Polysulfides (H<sub>2</sub>Sn) produced from the interaction of hydrogen sulfide (H<sub>2</sub>S) and nitric oxide (NO) activate TRPA1 channels. *Sci. Rep.* **7**, 1–10. doi:10.1038/srep45995
- Montoya, L. A., Shen, X., McDermott, J. J., Kevil, C. G. and Pluth, M. D. (2015). Mechanistic investigations reveal that dibromobimane extrudes sulfur from biological sulphydryl sources other than hydrogen sulfide. *Chem. Sci.* **6**, 294–300. doi:10.1039/C4SC01875C
- Mustafa, A. K., Gadalla, M. M., Sen, N., Kim, S., Mu, W., Gazi, S. K., Barrow, R. K., Yang, G., Wang, R. and Snyder, S. H. (2009). H<sub>2</sub>S signals through protein S-sulphydration. *Sci. Signal.* **2**, 1–9. doi:10.1126/scisignal.262tr1
- Nagahara, N., Ito, T., Kitamura, H. and Nishino, T. (1998). Tissue and subcellular distribution of mercaptopyruvate sulfurtransferase in the rat: confocal laser fluorescence and immunoelectron microscopic studies combined with biochemical analysis. *Histochem. Cell Biol.* **110**, 243–250. doi:10.1007/s004180050286
- Olson, K. R. (2013). Hydrogen sulfide as an oxygen sensor. *Clin. Chem. Lab. Med.* **51**, 623–632. doi:10.1515/cclm-2012-0551
- Olson, K. R. and Straub, K. D. (2016). The role of hydrogen sulfide in evolution and the evolution of hydrogen sulfide in metabolism and signaling. *Physiology* **31**, 60–72. doi:10.1152/physiol.00024.2015
- Olson, K. R., DeLeon, E. R., Gao, Y., Hurley, K., Sadauskas, V., Batz, C. and Stoy, G. F. (2013). Thiosulfate: a readily accessible source of hydrogen sulfide in oxygen sensing. *Am. J. Physiol. Regul. Integr. Comp. Physiol.* **305**, R592–R603. doi:10.1152/ajpregu.00421.2012
- Paul, B. D. and Snyder, S. H. (2012). H<sub>2</sub>S signalling through protein sulphydration and beyond. *Nat. Rev. Mol. Cell Biol.* **13**, 499–507. doi:10.1038/nrm3391
- Petersen, A. G., Petersen, S. V., Frische, S., Drakulic, S., Golas, M. M., Sander, B. and Fago, A. (2018). Hemoglobin polymerization via disulfide bond formation in the hypoxia-tolerant turtle *Trachemys scripta*: implications for antioxidant defense and O<sub>2</sub> transport. *Am. J. Physiol. - Regul. Integr. Comp. Physiol.* **314**, R84–R93. doi:10.1152/ajpregu.00024.2017
- Pietri, R., Román-Morales, E. and López-Garriga, J. (2011). Hydrogen sulfide and hemoproteins: knowledge and mysteries. *Antioxid. Redox Signal.* **15**, 393–404. doi:10.1089/ars.2010.3698

- Revsbech, I. G., Shen, X., Chakravarti, R., Jensen, F. B., Thiel, B., Evans, A. L., Kindberg, J., Frøbert, O., Stuehr, D. J., Kevil, C. G. et al. (2014). Hydrogen sulfide and nitric oxide metabolites in the blood of free-ranging brown bears and their potential roles in hibernation. *Free Radic. Biol. Med.* **73**, 349–357. doi:10.1016/j.freeradbiomed.2014.05.025
- Shen, X., Pattillo, C. B., Pardue, S., Bir, S. C., Wang, R. and Kevil, C. G. (2011). Measurement of plasma hydrogen sulfide in vivo and in vitro. *Free Radic. Biol. Med.* **50**, 1021–1031. doi:10.1016/j.freeradbiomed.2011.01.025
- Shen, X., Peter, E. A., Bir, S., Wang, R. and Kevil, C. G. (2012). Analytical measurement of discrete hydrogen sulfide pools in biological specimens. *Free Radic. Biol. Med.* **52**, 2276–2283. doi:10.1016/j.freeradbiomed.2012.04.007
- Shen, X., Carlström, M., Broniquel, S., Jädert, C., Kevil, C. G. and Lundberg, J. (2013). Microbial regulation of host hydrogen sulfide bioavailability and metabolism. *Free Radic. Biol. Med.* **30**, 195–200. doi:10.1016/j.freeradbiomed.2013.02.024
- Shen, X., Chakraborty, S., Dugas, T. R. and Kevil, C. G. (2014). Hydrogen sulfide measurement using sulfide dibimane: Critical evaluation with electrospray ion trap mass spectrometry. *Nitric Oxide* **41**, 97–104. doi:10.1016/j.niox.2014.06.002
- Shen, X., Kolluru, G. K., Yuan, S. and Kevil, C. G. (2015). *Measurement of H<sub>2</sub>S In Vivo and in Vitro by the Monobromobimane Method*, 1st edn. Elsevier Inc.
- Shen, X., Kevil, C. G., Pardue, S., Leskova, A. and Glawe, J. D. (2017). Role of thiosulfate in hydrogen sulfide-dependent redox signaling in endothelial cells. *Am. J. Physiol. Circ. Physiol.* **313**, H256–H264. doi:10.1152/ajpheart.00723.2016
- Shibuya, N., Koike, S., Tanaka, M., Ishigami-Yuasa, M., Kimura, Y., Ogasawara, Y., Fukui, K., Nagahara, N. and Kimura, H. (2013). A novel pathway for the production of hydrogen sulfide from D-cysteine in mammalian cells. *Nat. Commun.* **4**, 1366–1367. doi:10.1038/ncomms2371
- Stecyk, J. A. W., Overgaard, J., Farrel, A. P. and Wang, T. (2004). Alfa-Adrenergic regulation of systemic peripheral resistance and blood flow distribution in the turtle *Trachemys scripta* during anoxic submergence at 5 C and 21 C. *J. Exp. Biol.* **207**, 269–283. doi:10.1242/jeb.00744
- Takahashi, H., Shin, Y., Cho, S.-J., Zago, W. M., Nakamura, T., Gu, Z., Ma, Y., Furukawa, H., Liddington, R., Zhang, D. et al. (2007). Hypoxia enhances S-nitrosylation-mediated NMDA receptor inhibition via a thiol oxygen sensor motif. *Neuron* **53**, 53–64. doi:10.1016/j.neuron.2006.11.023
- Tan, B., Jin, S., Sun, J., Gu, Z., Sun, X., Zhu, Y., Huo, K., Cao, Z., Yang, P., Xin, X. et al. (2017). New method for quantification of gasotransmitter hydrogen sulfide in biological matrices by LC-MS/MS. *Sci. Rep.* **7**, 1–12. doi:10.1038/srep46278
- Tøien, Ø., Blake, J., Edgar, D. M., Grahn, D. A., Heller, H. C. and Barnes, B. M. (2011). Hibernation in black bears: independence of metabolic suppression from body temperature. *Science* **331**, 906–909. doi:10.1126/science.1199435
- Ulltsch, G. R. (1989). Ecology and physiology of hibernation and overwintering among freshwater fishes, turtles, and snakes. *Biol. Rev.* **64**, 435–515. doi:10.1111/j.1469-185X.1989.tb00683.x
- Ulltsch, G. R. (2006). The ecology of overwintering among turtles: where turtles overwinter and its consequences. *Biol. Rev. Camb. Philos. Soc.* **81**, 339–367. doi:10.1017/S1464793106007032
- Vicente, J. B., Malagrinò, F., Aresé, M., Forte, E., Sarti, P. and Giuffrè, A. (2016). Bioenergetic relevance of hydrogen sulfide and the interplay between gasotransmitters at human cystathionine  $\beta$ -synthase. *Biochim. Biophys. Acta Bioenerg.* **1857**, 1127–1138. doi:10.1016/j.bbabo.2016.03.030
- Wang, R. U. I. (2002). Two's company, three s a crowd: can H<sub>2</sub>S be the third endogenous gaseous transmitter? *FASEB J.* **16**, 1792–1798. doi:10.1096/fj.02-0211hyp
- Warren, D. E., Reese, S. A. and Jackson, D. C. (2006). Tissue glycogen and extracellular buffering limit the survival of red-eared slider turtles during anoxic submergence at 3C. *Physiol. Biochem. Zool.* **79**, 736–744. doi:10.1086/504617
- Xia, M., Chen, L., Muh, R. W., Li, P.-L. and Li, N. (2009). Production and actions of hydrogen sulfide, a novel gaseous bioactive substance, in the kidneys. *J. Pharmacol. Exp. Ther.* **329**, 1056–1062. doi:10.1124/jpet.108.149963
- Yang, G., Wu, L., Jiang, B., Yang, W., Qi, J., Cao, K., Meng, Q., Mustafa, A. K., Mu, W., Zhang, S. et al. (2008). H<sub>2</sub>S as a physiologic vasorelaxant: hypertension in mice with deletion of cystathionine gamma-lyase. *Science* **322**, 587–590. doi:10.1126/science.1162667
- Zhao, W., Zhang, J., Lu, Y. and Wang, R. (2012). The vasorelaxant effect of H<sub>2</sub>S as a novel endogenous gaseous KATP channel opener. *EMBO J.* **20**, 6008–6016. doi:10.1093/emboj/20.21.6008
